# Supplementary material
Source: Frontiers journal article supplement (https://www.frontiersin.org/articles/309890)

In this supplementary file, it provides all raw images that were used for the quantification of gold particle densities in companion cells (CC), sieve elements (SE) and extracellular space (ES) (Figure 2E).

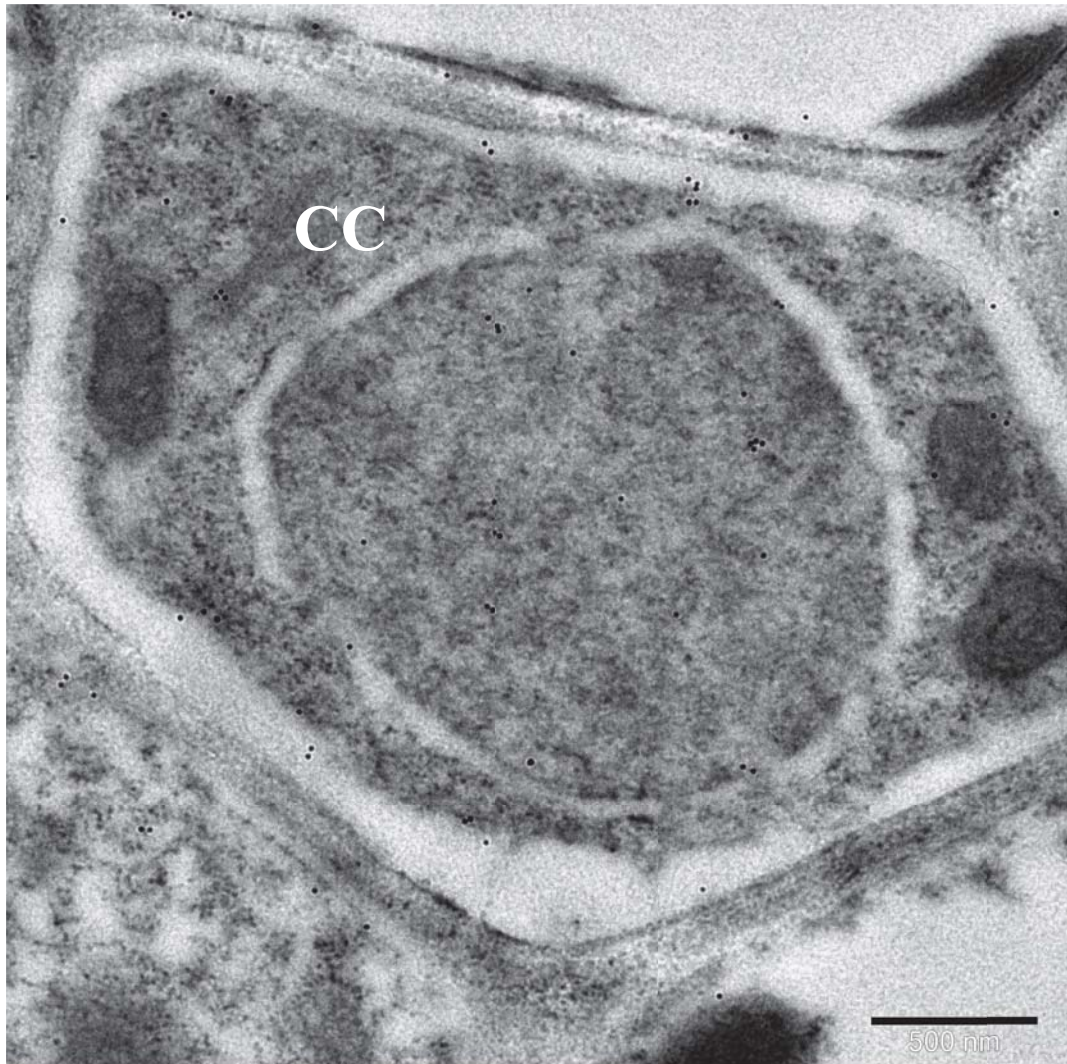

|                      |               |
|----------------------|---------------|
| Accelerating Voltage | Magnification |
| 100 kV               | 8900 x        |

—500 nm—

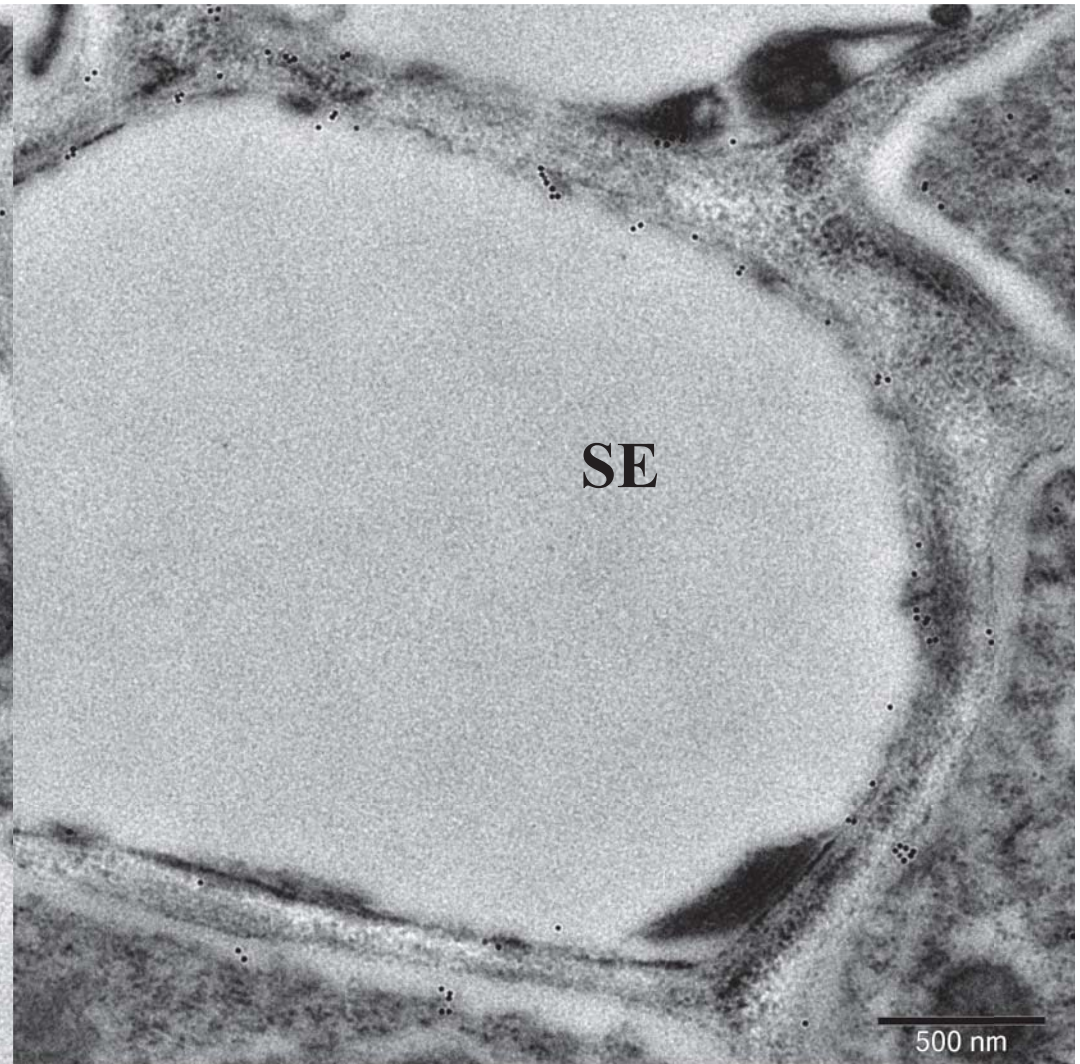

|                      |               |
|----------------------|---------------|
| Accelerating Voltage | Magnification |
| 100 kV               | 8900 x        |

—500 nm—



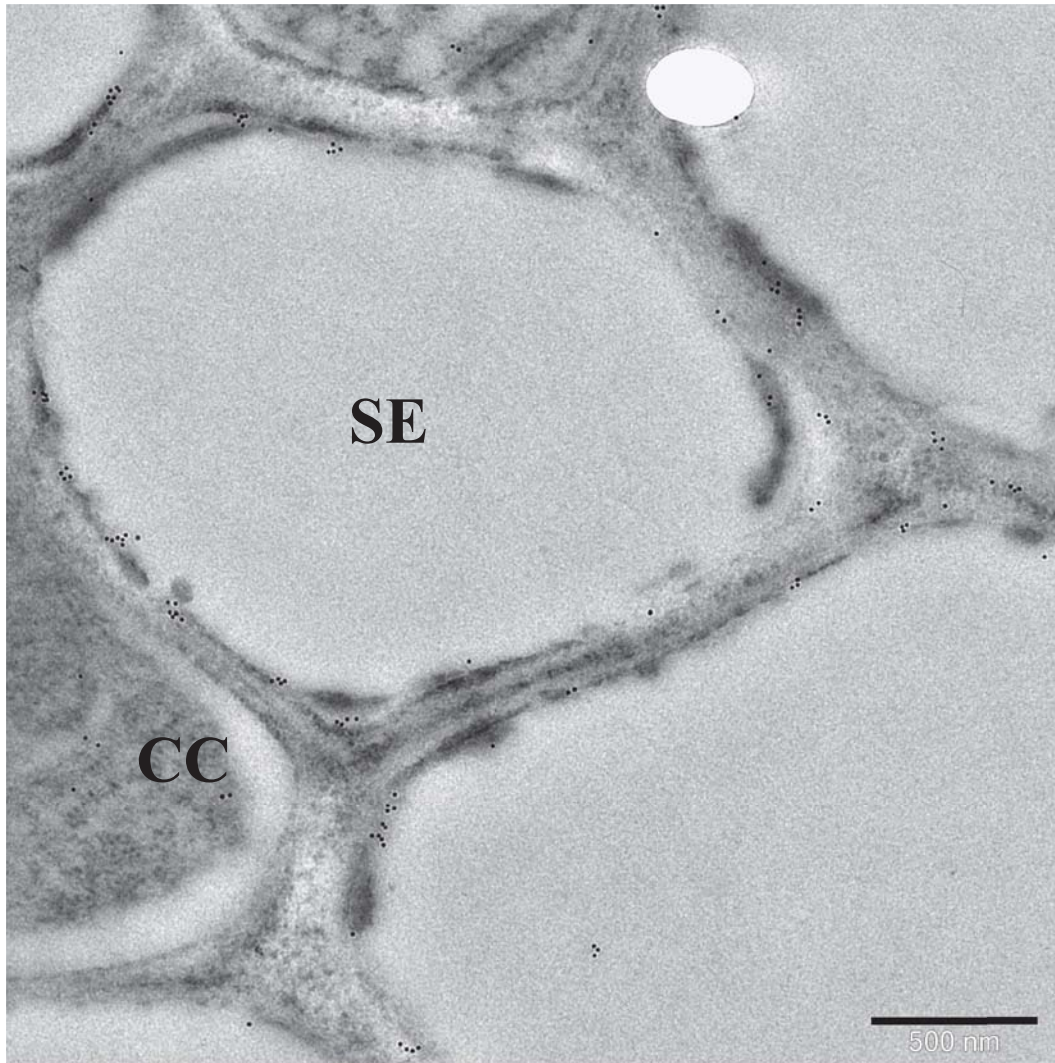

Accelerating Voltage  
100 kV

Magnification  
8900 x

—500 nm—

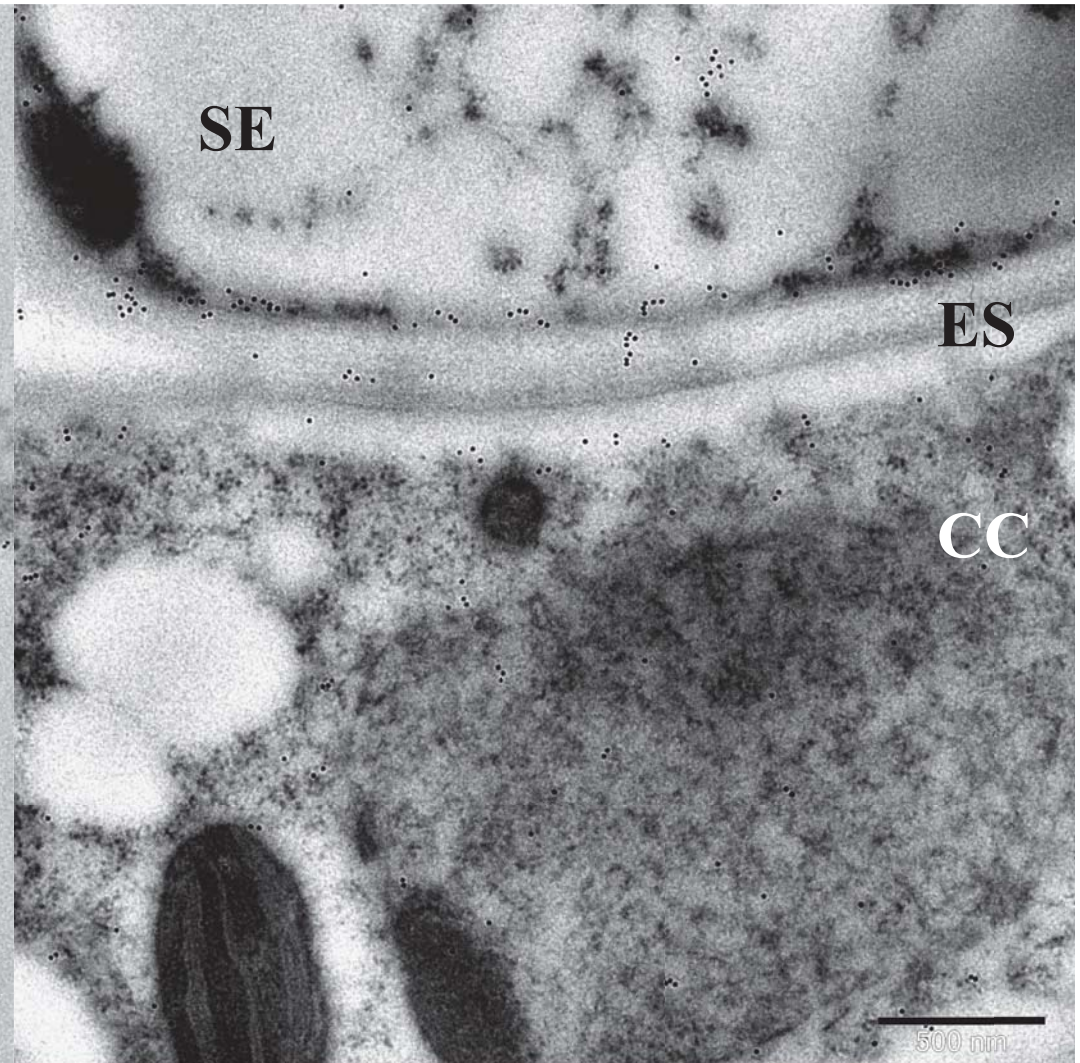

Accelerating Voltage  
100 kV

Magnification  
8900 x

—500 nm—



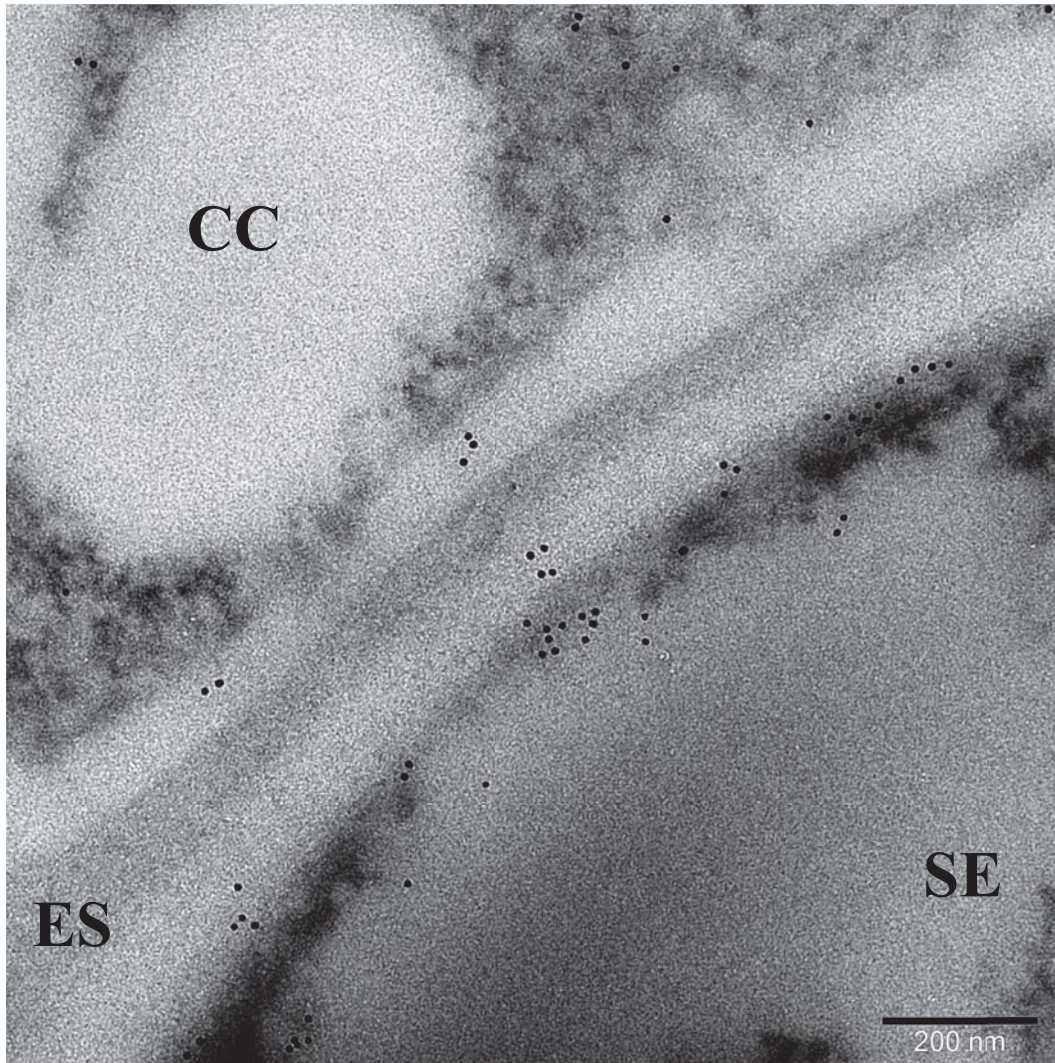

| Accelerating Voltage | Magnification |
|----------------------|---------------|
| 100 kV               | 21000 x       |

—200 nm—

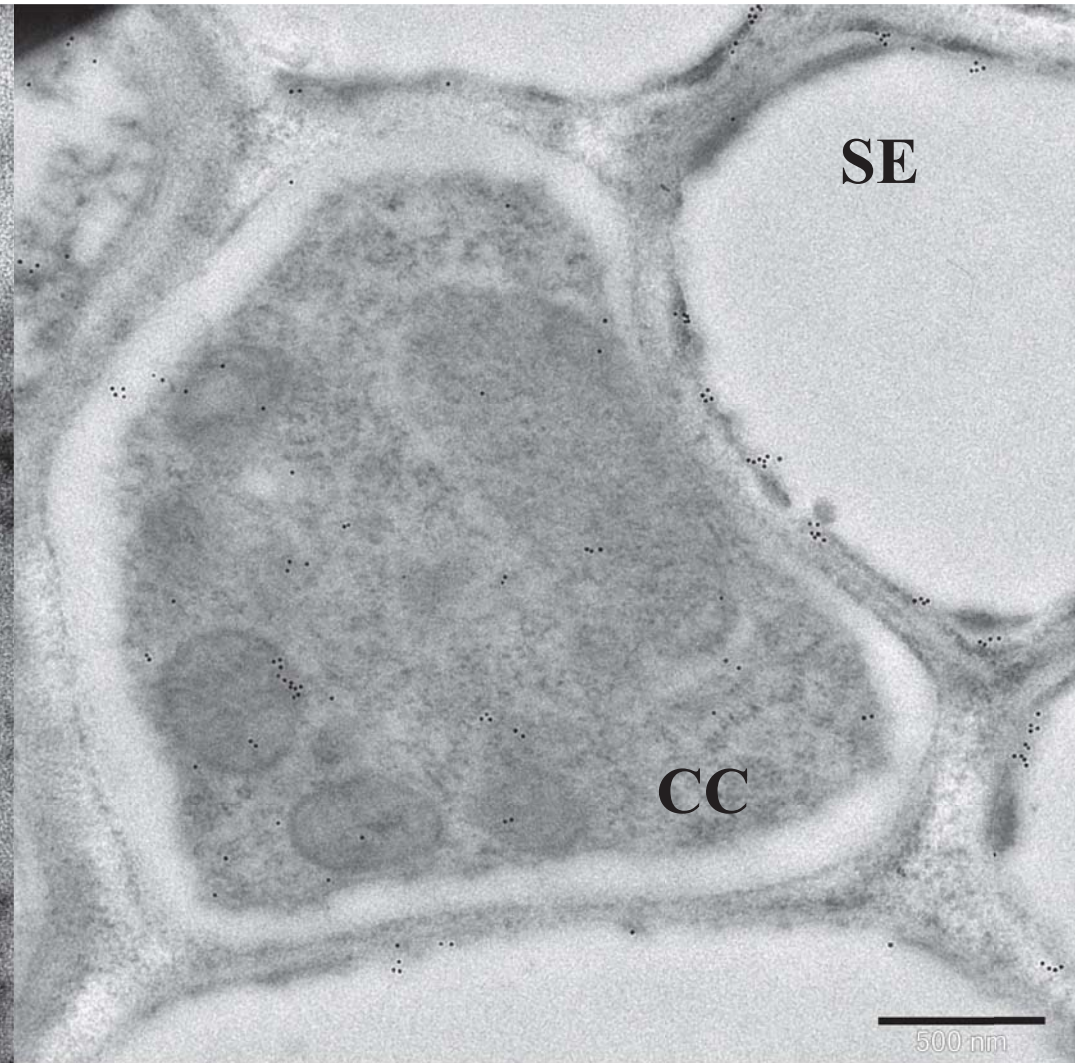

| Accelerating Voltage | Magnification |
|----------------------|---------------|
| 100 kV               | 8900 x        |

—500 nm—



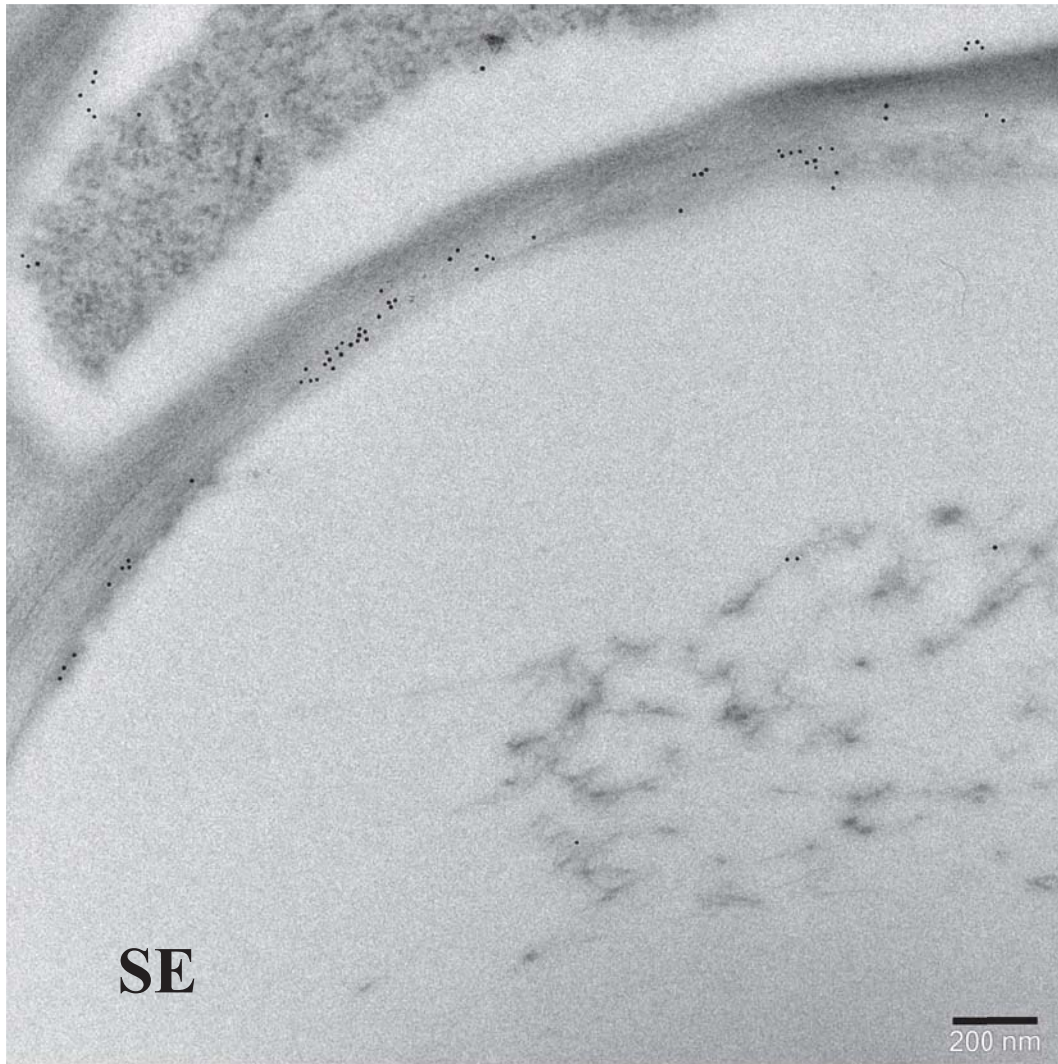

| Accelerating Voltage | Magnification |
|----------------------|---------------|
| 100 kV               | 11500 x       |

—500 nm—

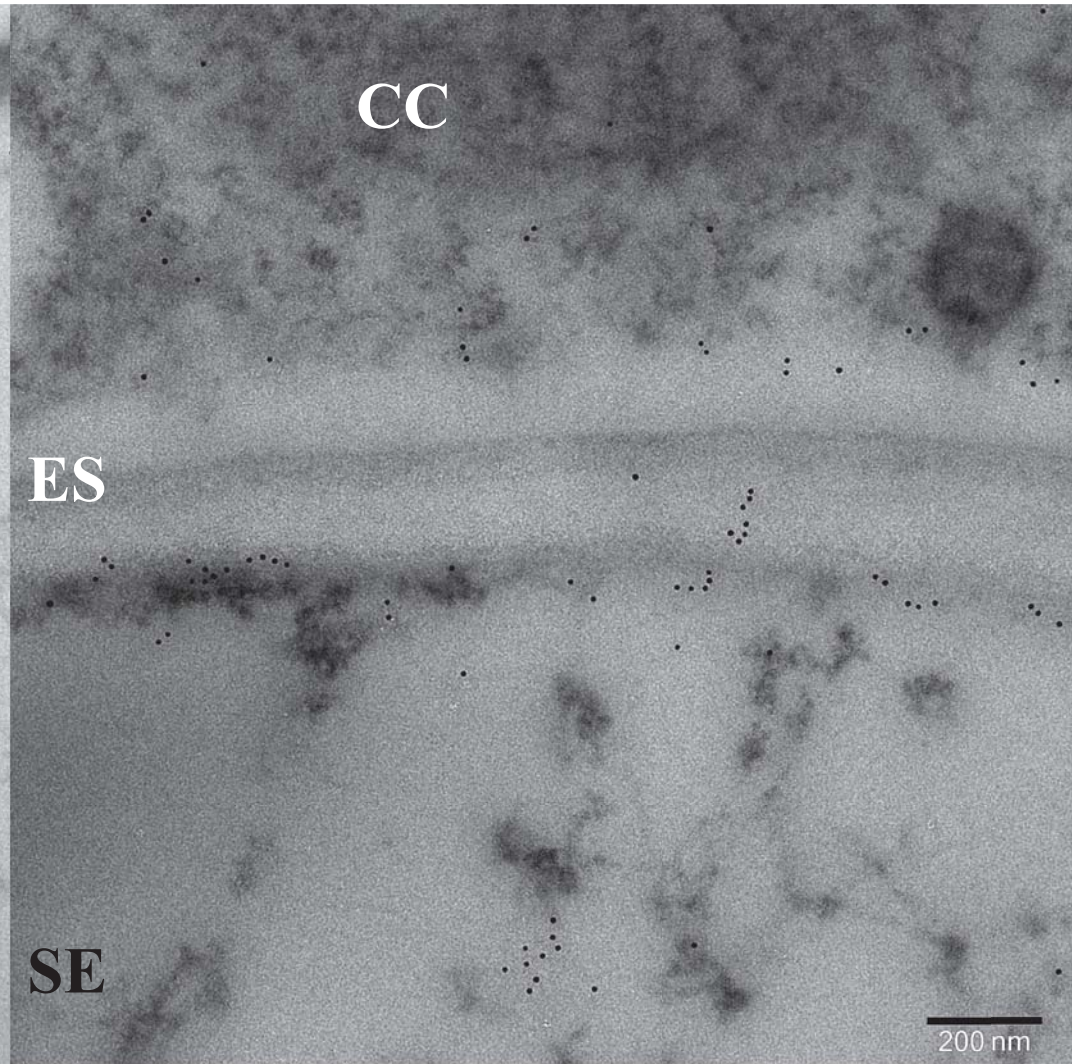

| Accelerating Voltage | Magnification |
|----------------------|---------------|
| 100 kV               | 15500 x       |

—200 nm—



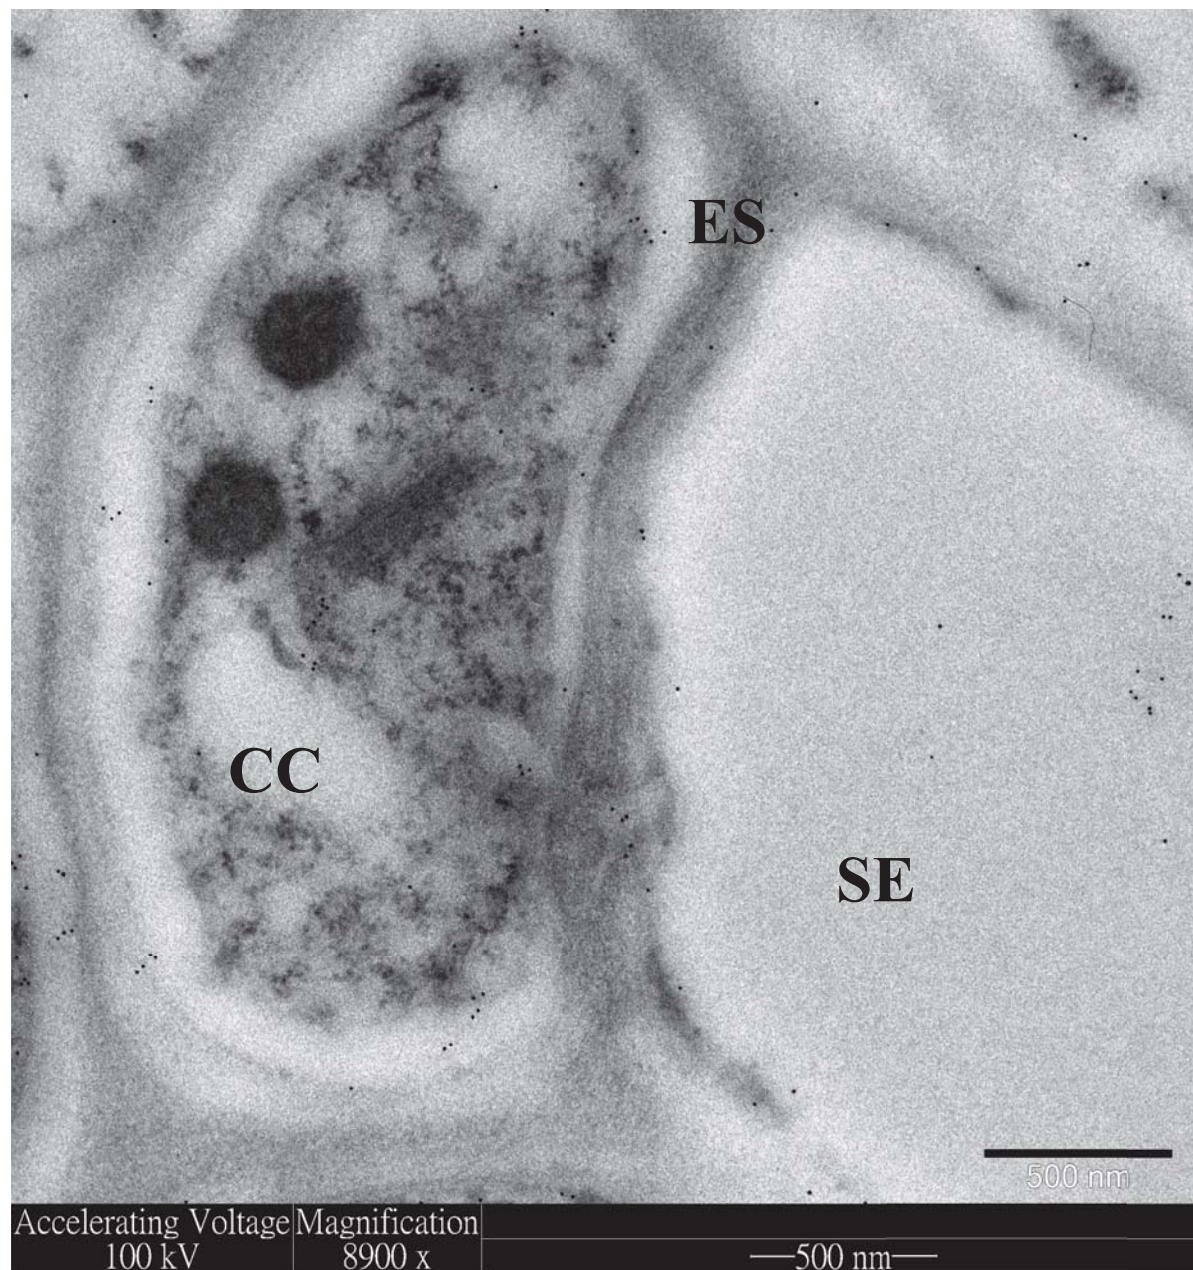

Supplement: Supplementary_IEM_Images.PDF [file Supplementary_IEM_Images.PDF]
